# Supplementary material for: Metabolite Profiling Reveals the Effect of Cold Storage on Primary Metabolism in Nectarine Varieties with Contrasting Mealiness
Source: MDPI journal article supplement (doi:10.3390/plants12040766), 2023-02-08
Supplement: s1 [file s1]

Supplementary Figure S1

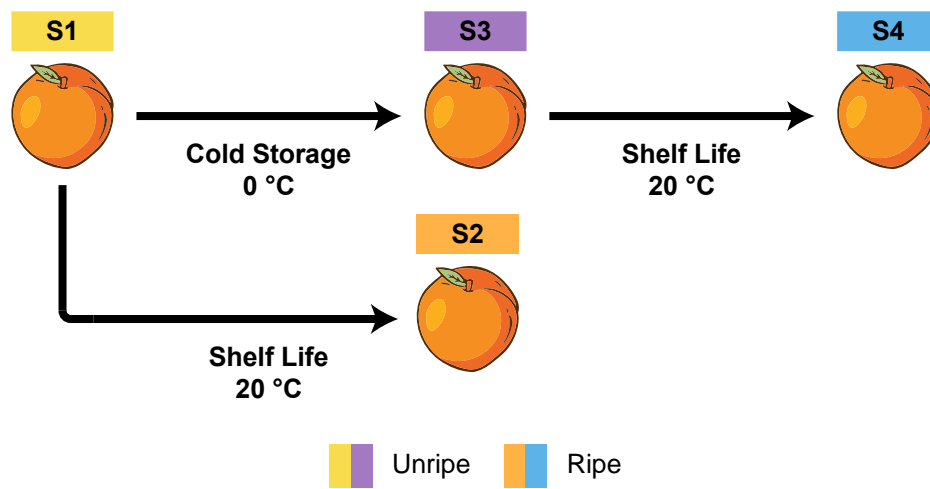

Supplementary Figure S1 : Representative scheme of experimental design and sampling points.
