# Supplementary material for: Metabolite Profiling Reveals the Effect of Cold Storage on Primary Metabolism in Nectarine Varieties with Contrasting Mealiness
Source: MDPI journal article supplement (doi:10.3390/plants12040766), 2023-02-08
Supplement: s1 [file s1]

**Supplementary Table S2.** Polar metabolites detected by GC-MS from nectarines ‘Andes Nec-2’ and ‘Andes Nec-3’ varieties.

| Metabolite                | Classification               | KEGG Entry |
|---------------------------|------------------------------|------------|
| 1-kestose                 | Sugar                        | C03661     |
| 1-O-nonyl-lyxitol         | Miscellaneous                | C01904     |
| 2-hydroxyglutaric acid    | Organic acid                 | C02630     |
| 3,4-dihydroxybenzoic acid | Organic acid                 | C00230     |
| 3,6-anhydro-D-galactose   | Sugar                        | C06474     |
| 3,6-anhydro-D-glucose     | Sugar                        | C06478     |
| 4-aminobutyric acid       | Non-proteinogenic amino acid | C00334     |
| 5-hydroxynorvaline        | Non-proteinogenic amino acid | NA         |
| 5-methyluridine           | Miscellaneous                | NA         |
| 6-deoxyglucitol           | Miscellaneous                | NA         |
| aconitic acid             | Organic acid                 | C00417     |
| adipic acid               | Organic acid                 | C06104     |
| alanine                   | Proteinogenic amino acid     | C00041     |
| alpha-ketoglutarate       | Organic acid                 | C00026     |
| alpha-tocopherol          | Miscellaneous                | C02477     |
| arachidic acid            | Fatty acid                   | C06425     |
| asparagine                | Proteinogenic amino acid     | C00152     |
| aspartic acid             | Proteinogenic amino acid     | C00049     |
| benzoic acid              | Organic acid                 | C00539     |
| beta-alanine              | Non-proteinogenic amino acid | C00099     |
| beta-gentiobiose          | Sugar                        | C08240     |
| beta-sitosterol           | Miscellaneous                | C01753     |
| butylamine                | Miscellaneous                | C18706     |
| catechin                  | Miscellaneous                | C06562     |
| cellobiose                | Sugar                        | C06422     |
| chlorogenic acid          | Organic acid                 | C00852     |
| citramalic acid           | Organic acid                 | C00815     |
| citric acid               | Organic acid                 | C00158     |
| cyano-L-alanine           | Non-proteinogenic amino acid | C02512     |
| deoxypentitol             | Miscellaneous                | NA         |
| diglycerol                | Miscellaneous                | NA         |
| epicatechin               | Miscellaneous                | C09727     |
| erythronic acid lactone   | Miscellaneous                | NA         |
| ethanolamine              | Miscellaneous                | C00189     |
| fructose                  | Sugar                        | C02336     |
| fructose-6-phosphate      | Sugar                        | C00085     |
| fucose                    | Sugar                        | C01019     |
| fumaric acid              | Organic acid                 | C00122     |
| galactinol                | Sugar derivative             | C01235     |
| galactonic acid           | Sugar derivative             | C00880     |
| galactosylglycerol        | Miscellaneous                | C05401     |
| galacturonic acid         | Sugar derivative             | C08348     |
| glucoheptulose            | Sugar                        | C08236     |
| gluconic acid             | Sugar derivative             | C00257     |
| glucose                   | Sugar                        | C00031     |

|                          |                              |        |
|--------------------------|------------------------------|--------|
| glucose-1-phosphate      | Sugar                        | C00446 |
| glucose-6-phosphate      | Sugar                        | C00092 |
| glutamic acid            | Proteinogenic amino acid     | C00025 |
| glutamine                | Proteinogenic amino acid     | C00064 |
| glutaric acid            | Organic acid                 | C00489 |
| glyceric acid            | Sugar derivative             | C00258 |
| glycerol                 | Miscellaneous                | C00116 |
| glycerol-3-phosphate     | Miscellaneous                | C00093 |
| glycine                  | Proteinogenic amino acid     | C00037 |
| glycolic acid            | Organic acid                 | C03547 |
| hexadecylglycerol        | Miscellaneous                | C13859 |
| hexose-6-phosphate       | Sugar                        | C02965 |
| histidine                | Proteinogenic amino acid     | C00135 |
| inositol-4-monophosphate | Sugar derivative             | C03546 |
| isocitric acid           | Organic acid                 | C00311 |
| isoleucine               | Proteinogenic amino acid     | C00407 |
| lactitol                 | Sugar derivative             | D08266 |
| leucine                  | Proteinogenic amino acid     | C00123 |
| leucrose                 | Sugar                        | NA     |
| levoglucosan             | Miscellaneous                | C22350 |
| linoleic acid            | Fatty acid                   | C01595 |
| linolenic acid           | Fatty acid                   | C06427 |
| lysine                   | Proteinogenic amino acid     | C00047 |
| maleic acid              | Organic acid                 | C01384 |
| malic acid               | Organic acid                 | C03668 |
| maltose                  | Sugar                        | C00208 |
| mannonic acid            | Sugar derivative             | C00514 |
| mucic acid               | Sugar derivative             | C00879 |
| N-acetyl-D-hexosamine    | Sugar derivative             | C03136 |
| N-acetylmannosamine      | Sugar derivative             | C00645 |
| nicotianamine            | Miscellaneous                | C05324 |
| nicotinic acid           | Miscellaneous                | C00253 |
| ornithine                | Non-proteinogenic amino acid | C00077 |
| oxoproline               | Non-proteinogenic amino acid | C01879 |
| palatinitol              | Sugar derivative             | NA     |
| palmitic acid            | Fatty acid                   | C00249 |
| phenylalanine            | Proteinogenic amino acid     | C00079 |
| phosphate                | Miscellaneous                | C00009 |
| pipecolinic acid         | Organic acid                 | C00408 |
| proline                  | Proteinogenic amino acid     | C00148 |
| putrescine               | Polyamine                    | C02896 |
| pyrophosphate            | Miscellaneous                | C00013 |
| quinic acid              | Organic acid                 | C00296 |
| ribitol                  | Sugar derivative             | C00474 |
| ribonic acid             | Sugar derivative             | C01685 |
| ribose                   | Sugar                        | C00121 |
| saccharic acid           | Sugar derivative             | C00818 |
| serine                   | Proteinogenic amino acid     | C00065 |

|                        |                              |        |
|------------------------|------------------------------|--------|
| shikimic acid          | Organic acid                 | C00493 |
| sorbitol               | Sugar derivative             | C00794 |
| spermidine             | Polyamine                    | C00315 |
| stearic acid           | Fatty acid                   | C01530 |
| stigmasterol           | Miscellaneous                | C05442 |
| succinic acid          | Organic acid                 | C00042 |
| sucrose                | Sugar                        | C00089 |
| threonic acid          | Organic acid                 | C01620 |
| threonine              | Proteinogenic amino acid     | C00188 |
| trans-4-hydroxyproline | Non-proteinogenic amino acid | C01157 |
| trehalose-6-phosphate  | Sugar                        | C00689 |
| tryptophan             | Proteinogenic amino acid     | C00078 |
| urea                   | Miscellaneous                | C00086 |
| uridine                | Miscellaneous                | C00299 |
| valine                 | Proteinogenic amino acid     | C00183 |
| xylitol                | Sugar derivative             | C00379 |
| xylonic acid           | Sugar derivative             | C05411 |
| xylose                 | Sugar                        | C00181 |
