# Supplementary material for: Metabolite Profiling Reveals the Effect of Cold Storage on Primary Metabolism in Nectarine Varieties with Contrasting Mealiness
Source: MDPI journal article supplement (doi:10.3390/plants12040766), 2023-02-08
Supplement: s1 [file s1]

**Supplementary Table S1.** Phenotypical properties of nectarines ‘Andes Nec-2’ and ‘Andes Nec-3’ varieties

| Stage | Variety     | Weight (g) | I <sub>AD</sub> | TSS % | Firmness (N) | Juice % |
|-------|-------------|------------|-----------------|-------|--------------|---------|
| S1    | Andes Nec-2 | 269.1      | 0.77            | 14.43 | 62.27        | –       |
|       | Andes Nec-3 | 207.6      | 0.69            | 13.33 | 59.68        | –       |
| S2    | Andes Nec-2 | –          | –               | –     | 8.97         | 39.44   |
|       | Andes Nec-3 | –          | –               | –     | 8.53         | 45.46   |
| S3    | Andes Nec-2 | –          | –               | –     | 59.68        | –       |
|       | Andes Nec-3 | –          | –               | –     | 55.04        | –       |
| S4    | Andes Nec-2 | –          | –               | –     | 7.47         | 27.72*  |
|       | Andes Nec-3 | –          | –               | –     | 6.54         | 50.69   |

Data were analyzed by t-test (\* $P < 0.05$ ;  $n = 9$ )
